# Supplementary material
Source: MDPI journal article supplement (https://www.mdpi.com/1999-4907/13/6/878)
Supplement: s1 [file s1]

Table S1. Document acquisition list

| Title                                                                                         | Continent     | Country     | Region         | Organ                                                      | Year | Research Content           | DOI                                                                                                     |
|-----------------------------------------------------------------------------------------------|---------------|-------------|----------------|------------------------------------------------------------|------|----------------------------|---------------------------------------------------------------------------------------------------------|
| <b>Web of Science</b>                                                                         |               |             |                |                                                            |      |                            |                                                                                                         |
| Agroforestry and the utilisation of fragile ecosystems                                        | Africa        | Kenya       | Nairobi        | International Council for Research in Agroforestry (ICRAF) | 1979 | Structural Design          | <a href="https://doi.org/10.1016/0378-1127(79)90044-6">https://doi.org/10.1016/0378-1127(79)90044-6</a> |
| Temporal analysis of agroforestry systems for rural development                               | North America | USA         | Seattle        | University of Washington                                   | 1984 | Factors                    | <a href="https://doi.org/10.1007/BF00147031">https://doi.org/10.1007/BF00147031</a>                     |
| Classification of agroforestry systems                                                        | Africa        | Kenya       | Nairobi        | International Council for Research in Agroforestry         | 1985 | Structural characteristics | <a href="https://doi.org/10.1007/BF00122638">https://doi.org/10.1007/BF00122638</a>                     |
| Traditional homegardens of Kerala: a sustainable human ecosystem                              | Europe        | Netherlands | Wageningen     | Agricultural University                                    | 1992 | Structural Design          | <a href="https://doi.org/10.1016/0167-8809(92)90108-N">https://doi.org/10.1016/0167-8809(92)90108-N</a> |
| The structure of four home gardens in the Petén, Guatemala                                    | Asia          | India       | Box 2          | Kerala Agricultural University                             | 1993 | Factors                    | <a href="https://doi.org/10.1007/BF00706892">https://doi.org/10.1007/BF00706892</a>                     |
| Soil conditions, vegetation structure and biomass of a Javanese homegarden                    | North America | USA         | West Lafayette | Purdue University                                          | 1993 | Structural characteristics | <a href="https://doi.org/10.1007/BF00706889">https://doi.org/10.1007/BF00706889</a>                     |
| Policy and institutional support for agroforestry: an analysis of two Ecuadorian case studies | Europe        | Denmark     | Copenhagen K   | University of Copenhagen                                   | 1993 | Structural characteristics | <a href="https://doi.org/10.1007/BF00706890">https://doi.org/10.1007/BF00706890</a>                     |
| Diversity, structure and standing stock of wood in the                                        | North America | USA         | Gainesville    | Conservation University of Florida                         | 1994 | Structural Design          | <a href="https://doi.org/10.1007/BF00705058">https://doi.org/10.1007/BF00705058</a>                     |

|                                                                                                                                |               |            |             |                                                         |      |                            |                                                                                                             |
|--------------------------------------------------------------------------------------------------------------------------------|---------------|------------|-------------|---------------------------------------------------------|------|----------------------------|-------------------------------------------------------------------------------------------------------------|
| homegardens of Kerala in peninsular India                                                                                      |               |            |             |                                                         |      |                            |                                                                                                             |
| A model simulating above- and below-ground tree architecture with agroforestry applications                                    | Asia          | India      | Thrissur    | All India Co-ordinated Research Project on Agroforestry | 1994 | Structural characteristics | <a href="https://doi.org/10.1007/BF00707463">https://doi.org/10.1007/BF00707463</a>                         |
| Structure and floristics of Bangladesh homegardens                                                                             | Europe        | France     | Montpellier | Unité de Modélisation des Plantes                       | 1995 | Structural characteristics | <a href="https://doi.org/10.1007/BF00708920">https://doi.org/10.1007/BF00708920</a>                         |
| Trees, soils, and food security                                                                                                | Asia          | Bangladesh | Gwynedd     | Chittagong University                                   | 1996 | Structural characteristics | <a href="https://doi.org/10.1007/BF00055427">https://doi.org/10.1007/BF00055427</a>                         |
| Natural systems as models for the design of sustainable systems of land use                                                    | Africa        | Kenya      | Nairobi     | International Centre for Research in Agroforestry       | 1997 | Structural optimization    | <a href="https://doi.org/10.1098/rstb.1997.0074">https://doi.org/10.1098/rstb.1997.0074</a>                 |
| Multispecies cropping systems in India: Predictions of their productivity, stability, resilience and ecological sustainability | Oceania       | Australia  |             | USDA Forest Service                                     | 1999 | Structural Design          | <a href="https://doi.org/10.1023/A:1006219721151">https://doi.org/10.1023/A:1006219721151</a>               |
| Defining competition vectors in a temperate alley cropping system in the midwestern USA: 2. Competition for water              | Oceania       | Australia  | Nedlands    | The University of Western Australia                     | 1999 | Stability Study            | <a href="https://doi.org/10.1023/A:1006285319817">https://doi.org/10.1023/A:1006285319817</a>               |
| Biomass management and diversification within cocoa agroforests in the humid forest zone of Southern Cameroon                  | North America | USA        | Butlerville | Southeast Purdue Agriculture Center                     | 2000 | Factors                    | <a href="https://doi.org/10.1023/A:1006289322392">https://doi.org/10.1023/A:1006289322392</a>               |
| Windbreaks in North American agricultural systems                                                                              | Europe        | Germany    | Cuvillier   | University of Bonn                                      | 2004 | Structural characteristics | <a href="https://cuvillier.de/de/shop/publications/2853">https://cuvillier.de/de/shop/publications/2853</a> |

|                                                                                                                                    |               |             |              |                                   |      |                            |                                                                                                                     |
|------------------------------------------------------------------------------------------------------------------------------------|---------------|-------------|--------------|-----------------------------------|------|----------------------------|---------------------------------------------------------------------------------------------------------------------|
| Microclimate in agroforestry systems in central Amazonia: does canopy closure matter to soil organisms?                            | North America | USA         | Nebraska     | School of Natural Resources       | 2004 | Structural optimization    | <a href="https://doi.org/10.1007/978-94-017-2424-1_5">https://doi.org/10.1007/978-94-017-2424-1_5</a>               |
| Possibilities for agroforestry development in Bulgaria: Outlooks and limitations                                                   | Europe        | Germany     | Karlsruhe    | Center for Development Research   | 2004 | Structural characteristics | <a href="https://doi.org/10.1023/B:AGFO.0000024419.20709.6c">https://doi.org/10.1023/B:AGFO.0000024419.20709.6c</a> |
| Dynamics of Homegarden Structure and Function in Kerala, India                                                                     | Europe        | Bulgaria    | Sofia        | University of Forestry            | 2006 | Structural Design          | <a href="https://doi.org/10.1016/j.ecoleng.2006.09.013">https://doi.org/10.1016/j.ecoleng.2006.09.013</a>           |
| Commercialization of homegardens in an Indonesian village: vegetation composition and functional changes                           | Europe        | Netherlands | Wageningen   | Wageningen University             | 2006 | Structural characteristics | <a href="https://doi.org/10.1007/s10457-005-2919-x">https://doi.org/10.1007/s10457-005-2919-x</a>                   |
| Biodiversity conservation in cocoa production landscapes: an overview                                                              | Asia          | Japan       | Tokyo        | University of Tokyo               | 2006 | Structural characteristics | <a href="https://doi.org/10.1007/s10457-005-7475-x">https://doi.org/10.1007/s10457-005-7475-x</a>                   |
| Traditional agroforestry systems as tools for conservation of genetic resources of <i>Milicia excelsa</i> Welw. C.C. Berg in Benin | North America | USA         | Arlington    | Conservation International        | 2007 | Structural optimization    | <a href="https://doi.org/10.1007/s10531-007-9195-1">https://doi.org/10.1007/s10531-007-9195-1</a>                   |
| Traditional agroforestry systems as tools for conservation of genetic resources of <i>Milicia excelsa</i> Welw. C.C. Berg in Benin | Africa        | Benin       | Parakou      | Université de Parakou             | 2008 | Structural optimization    | <a href="https://doi.org/10.1007/s10457-008-9109-6">https://doi.org/10.1007/s10457-008-9109-6</a>                   |
| Household and homegarden characteristics in southwestern Bangladesh                                                                | North America | Canada      | Sainte-Foy   | Université Laval                  | 2008 | Structural optimization    | <a href="https://doi.org/10.1007/s10457-008-9109-6">https://doi.org/10.1007/s10457-008-9109-6</a>                   |
| Testing a biological mechanism of the insurance hypothesis in experimental aquatic communities                                     | Asia          | Thailand    | Pathum Thani | The Asian Institute of Technology | 2008 | Factors                    | <a href="https://doi.org/10.1007/s10457-008-9142-5">https://doi.org/10.1007/s10457-008-9142-5</a>                   |

|                                                                                                                                                  |         |             |             |                                                                                 |      |                            |                                                                                                                 |
|--------------------------------------------------------------------------------------------------------------------------------------------------|---------|-------------|-------------|---------------------------------------------------------------------------------|------|----------------------------|-----------------------------------------------------------------------------------------------------------------|
| Resilience in Agriculture through Crop Diversification: Adaptive Management for Environmental Change                                             | Europe  | UK          | Sheffield   | University of Sheffield                                                         | 2009 | Stability Study            | <a href="https://doi.org/10.1111/j.1365-2656.2009.01586.x">https://doi.org/10.1111/j.1365-2656.2009.01586.x</a> |
| Vegetation structure and productivity in cocoa-based agroforestry systems in Talamanca, Costa Rica                                               | Oceania | Australia   |             | Australian Commonwealth Scientific and Industrial Research Organisation         | 2011 | Stability Study            | <a href="https://doi.org/10.1525/bio.2011.61.3.4">https://doi.org/10.1525/bio.2011.61.3.4</a>                   |
| Evolution of agroforestry based farming systems: a study of Dhanusha Distric                                                                     | Europe  | France      | Montpellier | CIRAD/UMR System – SupAgro                                                      | 2012 | Factors                    | <a href="https://doi.org/10.1016/j.agee.2011.03.003">https://doi.org/10.1016/j.agee.2011.03.003</a>             |
| Cacao-fruit tree intercropping effects on cocoa yield, plant vigour and light interception in Côte d’Ivoire                                      | Oceania | Australia   | Toowoomba   | Faculty of Business and Law/Australian Centre for Sustainable catchments (ACSC) | 2012 | Factors                    | <a href="https://doi.org/10.1007/s10457-012-9504-x">https://doi.org/10.1007/s10457-012-9504-x</a>               |
| Comparing tree diversity and population structure between a traditional agroforestry system and natural forests of Barak valley, Northeast India | Africa  | Ivory Coast | Divo        | CNRA Divo                                                                       | 2013 | Structural optimization    | <a href="https://doi.org/10.1007/s10457-013-9619-8">https://doi.org/10.1007/s10457-013-9619-8</a>               |
| Comparing tree diversity and population structure between a traditional agroforestry system and natural forests of Barak valley, Northeast India | Asia    | India       | Dehradun    | Forestry and Ecology Department, Indian                                         | 2013 | Structural characteristics | <a href="https://doi.org/10.1080/21513732.2012.748691">https://doi.org/10.1080/21513732.2012.748691</a>         |
| On the dimensionality of ecological stability                                                                                                    | Asia    | India       | Dehradun    | Forestry and Ecology Department                                                 | 2013 | Structural characteristics | <a href="http://dx.doi.org/10.1080/21513732.2012.748691">http://dx.doi.org/10.1080/21513732.2012.748691</a>     |

|                                                                                                                                                                   |               |             |            |                                       |      |                         |                                                                                                         |
|-------------------------------------------------------------------------------------------------------------------------------------------------------------------|---------------|-------------|------------|---------------------------------------|------|-------------------------|---------------------------------------------------------------------------------------------------------|
| Production and Robustness of a Cacao Agroecosystem: Effects of Two Contrasting Types of Management Strategies                                                     | Europe        | Ireland     | Trinity    | School of Natural Sciences            | 2013 | Stability Study         | <a href="https://doi.org/10.1111/ele.12086">https://doi.org/10.1111/ele.12086</a>                       |
| Diversity, composition and density of trees and shrubs in agroforestry homegardens in Southern Ethiopia                                                           | Europe        | France      | Paris      | Georg-August-University of Göttingen  | 2013 | Stability Study         | <a href="https://doi.org/10.1371/journal.pone.0080352">https://doi.org/10.1371/journal.pone.0080352</a> |
| Farmers in Côte d'Ivoire value integrating tree diversity in cocoa for the provision of ecosystem services                                                        | Europe        | Netherlands | Wageningen | Wageningen University                 | 2013 | Factors                 | <a href="https://doi.org/10.1007/s10457-013-9637-6">https://doi.org/10.1007/s10457-013-9637-6</a>       |
| Effects of species and shelterbelt structure on wind speed reduction in shelter                                                                                   | Africa        | Kenya       | Nairobi    | World Agroforestry Centre (ICRAF)     | 2014 | Structural optimization | <a href="https://doi.org/10.1007/s10457-014-9679-4">https://doi.org/10.1007/s10457-014-9679-4</a>       |
| Can agroforestry option values improve the functioning of drivers of agricultural intensification in Africa?                                                      | Asia          | Vietnam     | Hanoi      | Silviculture Research Institute       | 2014 | Structural optimization | <a href="https://doi.org/10.1007/s10457-013-9671-4">https://doi.org/10.1007/s10457-013-9671-4</a>       |
| Agroforestry in Liberia: household practices, perceptions and livelihood benefits                                                                                 | Africa        | Kenya       | Nairobi    | The World Agroforestry Centre (ICRAF) | 2014 | Stability Study         | <a href="https://doi.org/10.1016/j.cosust.2013.10.007">https://doi.org/10.1016/j.cosust.2013.10.007</a> |
| Changes in soil organic carbon and total nitrogen in croplands converted to walnut-based agroforestry systems and orchards in southeastern Loess Plateau of China | North America | USA         | Michigan   | University of Michigan School         | 2015 | Factors                 | <a href="https://doi.org/10.1007/s10457-014-9763-9">https://doi.org/10.1007/s10457-014-9763-9</a>       |
| Functional diversity and stability of litter-invertebrate communities following land-use change in Sumatra, Indonesia                                             | Asia          | China       | Nanjing    | Nanjing Forestry University           | 2015 | Structural optimization | <a href="http://dx.doi.org/10.1007/s10661-014-4131-9">http://dx.doi.org/10.1007/s10661-014-4131-9</a>   |

|                                                                                                                                          |               |          |             |                                                          |      |                            |                                                                                                                                                 |
|------------------------------------------------------------------------------------------------------------------------------------------|---------------|----------|-------------|----------------------------------------------------------|------|----------------------------|-------------------------------------------------------------------------------------------------------------------------------------------------|
| Diversidad florística y estructura en cacaotales tradicionales y bosque natural (Sumaco, Ecuador)                                        | Europe        | Germany  | Göttingen   | University of Göttingen                                  | 2015 | Stability Study            | <a href="https://doi.org/10.1016/j.biocomb.2015.08.033">https://doi.org/10.1016/j.biocomb.2015.08.033</a>                                       |
| Temporal stability analysis identifies soil water relations under different land use types in an oasis agroforestry ecosystem            | South America | Ecuador  |             | Universidad de Cuenca                                    | 2016 | Structural characteristics | <a href="http://dx.doi.org/10.14483/udistrital.jour.colomb.for.2016.2.a01">http://dx.doi.org/10.14483/udistrital.jour.colomb.for.2016.2.a01</a> |
| Habitat fragmentation and structure and composition of tree populations in a agroforestry landscape (southern Québec, Canada)            | Asia          | China    | Yangling    | Northwest A&F University                                 | 2016 | Stability Study            | <a href="https://doi.org/10.1016/j.geoderma.2016.02.023">https://doi.org/10.1016/j.geoderma.2016.02.023</a>                                     |
| Rehabilitation practices that shape cocoa agroforestry systems in Central Cameroon: key management strategies for long-term exploitation | North America | Canada   | Québec      | Université du Québec à Trois-Rivières                    | 2017 | Structural optimization    | <a href="https://doi.org/10.1007/s10457-017-0099-0">https://doi.org/10.1007/s10457-017-0099-0</a>                                               |
| Brachiaria physiological parameters in agroforestry systems                                                                              | Europe        | France   | Montpellier | CIRAD                                                    | 2017 | Structural Design          | <a href="https://doi.org/10.1007/s10457-016-0055-4">https://doi.org/10.1007/s10457-016-0055-4</a>                                               |
| Structure and composition of cocoa agroforests in the humid forest zone of Southern Cameroon                                             | South America | Brazil   | Diamantina  | Universidade Federal dos Vales do Jequitinhonha e Mucuri | 2017 | Factors                    | <a href="http://dx.doi.org/10.1590/0103-8478cr20160150">http://dx.doi.org/10.1590/0103-8478cr20160150</a>                                       |
| Benefits of increasing plant diversity in sustainable agroecosystems                                                                     | Africa        | Cameroon | Yaoundé     | Sustainable Tree Crops Program (STCP)                    | 2017 | Structural characteristics | <a href="https://doi.org/10.1007/s10457-016-9942-y">https://doi.org/10.1007/s10457-016-9942-y</a>                                               |
| Global assessment of agricultural system redesign for sustainable intensification                                                        | North America | USA      | Saint Paul  | University of Minnesota Twin Cities                      | 2017 | Structural characteristics | <a href="https://doi.org/10.1111/1365-2745.12789">https://doi.org/10.1111/1365-2745.12789</a>                                                   |

|                                                                                                                                                |        |         |            |                                                                                                                                               |      |                            |                                                                                                               |
|------------------------------------------------------------------------------------------------------------------------------------------------|--------|---------|------------|-----------------------------------------------------------------------------------------------------------------------------------------------|------|----------------------------|---------------------------------------------------------------------------------------------------------------|
| Relationships between shelter effects and optical porosity: A meta-analysis for tree windbreaks                                                | Europe | UK      | Colchester | Ohio State University                                                                                                                         | 2018 | Structural Design          | <a href="https://doi.org/10.1038/s41893-018-0114-0">https://doi.org/10.1038/s41893-018-0114-0</a>             |
| Supporting and regulating ecosystem services in cacao agroforestry systems                                                                     | Asia   | China   | Zhejiang   | East China Coastal Forest Ecosystem Long-term Research Station                                                                                | 2018 | Structural characteristics | <a href="https://doi.org/10.1016/j.agrformet.2018.04.013">https://doi.org/10.1016/j.agrformet.2018.04.013</a> |
| Yield and crown structure characteristics in a black locust ( <i>Robinia pseudoacacia</i> L.) stand: A case study – Short Communication        | Europe | France  | Lyon Cedex | Department of Agroecology and Environment                                                                                                     | 2018 | Structural optimization    | <a href="https://doi.org/10.1007/s10457-017-0113-6">https://doi.org/10.1007/s10457-017-0113-6</a>             |
| Ecosystem multifunctionality is highly related to the shelterbelt structure and plant species diversity in mixed shelterbelts of eastern China | Europe | Hungary | Sárvár     | National Agricultural Research and Innovation Centre                                                                                          | 2018 | Structural characteristics | <a href="https://doi.org/10.17221/118/2017-JFS">https://doi.org/10.17221/118/2017-JFS</a>                     |
| Agroforestry systems of high nature and cultural value in Europe: provision of commercial goods and other ecosystem services                   | Asia   | China   | Hangzhou   | National Research Station of Eastern China Coastal Forest Ecosystem, Research Institute of Subtropical Forestry, Chinese Academy of Forestry, | 2018 | Factors                    | <a href="https://doi.org/10.1016/j.gecco.2018.e00470">https://doi.org/10.1016/j.gecco.2018.e00470</a>         |
| Habitat fragmentation and structure and composition of tree populations in a agroforestry landscape (southern Québec, Canada)                  | Europe | Spain   | Plasencia  | University of Extremadura                                                                                                                     | 2018 | Structural characteristics | <a href="https://doi.org/10.1007/s10457-017-0126-1">https://doi.org/10.1007/s10457-017-0126-1</a>             |

|                                                                                                                                                                                 |               |             |            |                                                                                           |      |                            |                                                                                                         |
|---------------------------------------------------------------------------------------------------------------------------------------------------------------------------------|---------------|-------------|------------|-------------------------------------------------------------------------------------------|------|----------------------------|---------------------------------------------------------------------------------------------------------|
| A Natural Capital Approach to Agroforestry Decision-Making at the Farm Scale                                                                                                    | North America | Canada      | Québec     | Université du Québec à Trois-Rivières                                                     | 2018 | Structural characteristics | <a href="https://doi.org/10.1007/s10457-017-0099-0">https://doi.org/10.1007/s10457-017-0099-0</a>       |
| Effects of rehabilitation pruning and agroforestry on cacao tree development and yield in an older full-sun plantation                                                          | Oceania       | Australia   | Sandy Bay  | School of Natural Sciences                                                                | 2019 | Structural characteristics | <a href="https://doi.org/10.3390/f10110980">https://doi.org/10.3390/f10110980</a>                       |
| Tree diversity and its ecological importance value in organic and conventional cocoa agroforests in Ghana                                                                       | Europe        | Switzerland | Frick      | Department of International Cooperation, Research Institute of Organic Agriculture (FiBL) | 2019 | Structural optimization    | <a href="https://doi.org/10.1017/S0014479718000431">https://doi.org/10.1017/S0014479718000431</a>       |
| Integrating local knowledge with tree diversity analyses to optimize on-farm tree species composition for ecosystem service delivery in coffee agroforestry systems of Uganda   | Europe        | UK          | Nottingham | Department of Agriculture and Environmental Science                                       | 2019 | Structural characteristics | <a href="https://doi.org/10.1371/journal.pone.0210557">https://doi.org/10.1371/journal.pone.0210557</a> |
| Assessment of the interaction between the spatial organization of citrus trees populations in cocoa agroforests and Phytophthora foot rot disease of citrus severity            | Africa        | Uganda      | Kampala    | International Institute of Tropical Agriculture (IITA)                                    | 2019 | Structural optimization    | <a href="https://doi.org/10.1007/s10457-017-0172-8">https://doi.org/10.1007/s10457-017-0172-8</a>       |
| Impacts of land use types on spatial patterns and neighbourhood distance of the agroforestry palm <i>Borassus aethiopum</i> Mart. in two climatic regions in Benin, West Africa | Africa        | Cameroon    | Yaoundé    | Université de Yaoundé                                                                     | 2019 | Structural characteristics | <a href="https://doi.org/10.1007/s10457-017-0140-3">https://doi.org/10.1007/s10457-017-0140-3</a>       |
| Structural analysis and mapping of agroforestry systems under                                                                                                                   | Europe        | Belgium     | Gemboux    | Université de Liège - Gembloux Agro-Bio Tech                                              | 2019 | Factors                    | <a href="https://doi.org/10.1007/s10457-018-0205-y">https://doi.org/10.1007/s10457-018-0205-y</a>       |



|                                                                                                                                                          |               |             |                 |                                                         |      |                            |                                                                                                           |
|----------------------------------------------------------------------------------------------------------------------------------------------------------|---------------|-------------|-----------------|---------------------------------------------------------|------|----------------------------|-----------------------------------------------------------------------------------------------------------|
| irrigated ecosystem in north-eastern part of Karnataka, India                                                                                            |               |             |                 |                                                         |      |                            |                                                                                                           |
| Structure of cocoa farming systems in West and Central Africa: a review                                                                                  | Asia          | India       | Karnataka       | University of Agricultural Sciences                     | 2019 | Factors                    | <a href="https://doi.org/10.1007/s10457-018-0277-8">https://doi.org/10.1007/s10457-018-0277-8</a>         |
| Ecological structure and carbon storage in traditional silvopastoral systems in Nicaragua                                                                | Africa        | Cameroon    | Yaoundé         | Sustainable Tree Crops Program (STCP)                   | 2019 | Structural characteristics | <a href="https://doi.org/10.1007/s10457-018-0306-7">https://doi.org/10.1007/s10457-018-0306-7</a>         |
| Horizontal and vertical diversity jointly shape food web stability against small and large perturbations                                                 | Latin America | Costa Rica  | Turrialba       | Centro Agronómico Tropical de Investigación y Enseñanza | 2019 | Structural optimization    | <a href="https://doi.org/10.1007/s10457-018-0234-6">https://doi.org/10.1007/s10457-018-0234-6</a>         |
| Temperate agroforestry systems provide greater pollination service than monoculture. Agriculture                                                         | Europe        | Netherlands | Wageningen      | Wageningen University                                   | 2019 | Stability Study            | <a href="https://doi.org/10.1111/ele.13282">https://doi.org/10.1111/ele.13282</a>                         |
| How agroforestry systems influence soil fauna and their functions - a review                                                                             | Europe        | UK          | Reading RG6 6AR | University of Reading                                   | 2020 | Structural Design          | <a href="https://doi.org/10.1016/j.agee.2020.107031">https://doi.org/10.1016/j.agee.2020.107031</a>       |
| Simplification of the structure and diversity of cocoa agroforests does not increase yield nor influence frosty pod rot in El Soconusco, Chiapas, Mexico | Europe        | France      | Montpellier     | Univ Montpellier                                        | 2020 | Structural characteristics | <a href="https://doi.org/10.1007/s11104-019-04322-4">https://doi.org/10.1007/s11104-019-04322-4</a>       |
| Woody species composition, structure, and diversity of homegarden agroforestry systems in southern Tigray, Northern Ethiopia                             | North America | Mexico      | Chiapas         | Tuxtla Gutierrez Chiapas                                | 2020 | Structural optimization    | <a href="https://doi.org/10.1007/s10457-020-00574-7">https://doi.org/10.1007/s10457-020-00574-7</a>       |
| Agroforestry and organic agriculture                                                                                                                     | Africa        | Ethiopia    | Mekelle         | Tigray Agricultural Research Institute, Mekelle         | 2020 | Structural characteristics | <a href="https://doi.org/10.1016/j.heliyon.2020.e05500">https://doi.org/10.1016/j.heliyon.2020.e05500</a> |

|                                                                                                                                                         |               |             |                   |                                                        |      |                            |                                                                                                               |
|---------------------------------------------------------------------------------------------------------------------------------------------------------|---------------|-------------|-------------------|--------------------------------------------------------|------|----------------------------|---------------------------------------------------------------------------------------------------------------|
|                                                                                                                                                         |               |             |                   | Agricultural Research Center                           |      |                            |                                                                                                               |
| Plant community composition and functional characteristics define invasion and infestation of termites in cocoa agroforestry systems                    | Europe        | Italy       | Spoletto          | Research Centre for Olive, Fruit and Citrus Crops      | 2020 | Structural Design          | <a href="https://doi.org/10.1007/s10457-020-00559-6">https://doi.org/10.1007/s10457-020-00559-6</a>           |
| How agroforestry systems influence soil fauna and their functions - a review                                                                            | Africa        | Cameroon    | Yaoundé           | University of Yaounde                                  | 2020 | Structural optimization    | <a href="https://doi.org/10.1007/s10457-019-00380-w">https://doi.org/10.1007/s10457-019-00380-w</a>           |
| Successional changes in vegetation and litter structure in traditional Lacandon Maya agroforests                                                        | Europe        | France      | Montpellier       | Montpellier University                                 | 2020 | Structural optimization    | <a href="https://doi.org/10.1007/s11104-019-04322-4">https://doi.org/10.1007/s11104-019-04322-4</a>           |
| Farmers' Perceptions as a Driver of Agricultural Practices: Understanding Soil Fertility Management Practices in Cocoa Agroforestry Systems in Cameroon | North America | USA         | New York          | Cornell University                                     | 2020 | Structural characteristics | <a href="https://doi.org/10.1080/21683565.2019.1649784">https://doi.org/10.1080/21683565.2019.1649784</a>     |
| Growth and yield of soybean cultivated in agroforestry systems                                                                                          | Europe        | Netherlands | Wageningen        | International Institute of Tropical Agriculture (IITA) | 2020 | Factors                    | <a href="http://dx.doi.org/10.1007/s10745-020-00190-0">http://dx.doi.org/10.1007/s10745-020-00190-0</a>       |
| Plant diversity and density in cocoa-based agroforestry systems: how farmers' income is affected in the Dominican Republic                              | South America | Brazil      | Rio Grande do Sul | Universidade Federal de Santa Maria                    | 2020 | Factors                    | <a href="http://dx.doi.org/10.1590/0034-737X202067030001">http://dx.doi.org/10.1590/0034-737X202067030001</a> |
| Canopy architecture of an agroforestry system: initial evaluation of a waveform system                                                                  | South America | Peru        | Lima              | World Agroforestry Centre                              | 2020 | Structural Design          | <a href="https://doi.org/10.1007/s10457-019-00472-7">https://doi.org/10.1007/s10457-019-00472-7</a>           |

|                                                                                                                                                                                                |               |           |             |                                                |      |                            |                                                                                                           |
|------------------------------------------------------------------------------------------------------------------------------------------------------------------------------------------------|---------------|-----------|-------------|------------------------------------------------|------|----------------------------|-----------------------------------------------------------------------------------------------------------|
| Structure, diversity and utilization of plant species in tribal homegardens of Kerala, India                                                                                                   | South America | Brazil    | São Paulo   | University of São Paulo                        | 2020 | Structural Design          | <a href="https://doi.org/10.1007/s10457-019-00415-2">https://doi.org/10.1007/s10457-019-00415-2</a>       |
| Agroforestry for Ecosystem Services: An Introduction                                                                                                                                           | Asia          | India     | Kerala      | Mahatma Gandhi University                      | 2020 | Structural characteristics | <a href="https://doi.org/10.1007/s10457-019-00393-5">https://doi.org/10.1007/s10457-019-00393-5</a>       |
| Species diversity, composition, structure and management in agroforestry systems: the case of Kachabira district, Southern Ethiopia                                                            | North America | USA       | Columbia    | University of Missouri                         | 2021 | Structural Design          | <a href="https://doi.org/10.1007/978-3-030-80060-4_1">https://doi.org/10.1007/978-3-030-80060-4_1</a>     |
| Impacts of traditional agroforestry practices, altitudinal gradients and households' wealth status on perennial plants species composition, diversity, and structure in south-central Ethiopia | Africa        | Ethiopia  | Addis Ababa | Ethiopian Biodiversity Institute               | 2021 | Structural characteristics | <a href="https://doi.org/10.1016/j.heliyon.2021.e06477">https://doi.org/10.1016/j.heliyon.2021.e06477</a> |
| Participative design of the spatial and temporal development of improved cocoa agroforestry systems for yield and biodiversity                                                                 | Africa        | Ethiopia  | Shashemene  | Hawassa University                             | 2021 | Factors                    | <a href="https://doi.org/10.1007/s10457-021-00659-x">https://doi.org/10.1007/s10457-021-00659-x</a>       |
| Socio-ecological dimensions of agroforestry called kebun campuran in tropical karst ecosystem of West Java, Indonesia                                                                          | Europe        | France    | Montpellier | Centre International for Agricultural Research | 2021 | Structural Design          | <a href="https://doi.org/10.1016/j.eja.2021.126395">https://doi.org/10.1016/j.eja.2021.126395</a>         |
| Impacts of traditional agroforestry practices, altitudinal gradients and households' wealth status on                                                                                          | Asia          | Indonesia | West Java   | Universitas Padjadjaran                        | 2021 | Structural optimization    | <a href="https://doi.org/10.13057/biodiv/d220117">https://doi.org/10.13057/biodiv/d220117</a>             |

|                                                                                                                                                 |               |           |                |                                                                                                                      |      |                            |                                                                                                               |
|-------------------------------------------------------------------------------------------------------------------------------------------------|---------------|-----------|----------------|----------------------------------------------------------------------------------------------------------------------|------|----------------------------|---------------------------------------------------------------------------------------------------------------|
| perennial plants species composition, diversity, and structure in south-central Ethiopia                                                        |               |           |                |                                                                                                                      |      |                            |                                                                                                               |
| A global review of rubber plantations: Impacts on ecosystem functions, mitigations, future directions, and policies for sustainable cultivation | Africa        | Ethiopia  | Shashe mene    | Hawassa University                                                                                                   | 2021 | Factors                    | <a href="https://doi.org/10.1007/s10457-021-00659-x">https://doi.org/10.1007/s10457-021-00659-x</a>           |
| Leaf litter species affects decomposition rate and nutrient release in a cocoa plantation                                                       | Asia          | China     | Yunnan         | CAS Key Laboratory of Tropical Forest Ecology, Xishuangbanna Tropical Botanical Garden, Chinese Academy of Sciences, | 2021 | Structural characteristics | <a href="https://doi.org/10.1016/j.scitotenv.2021.148948">https://doi.org/10.1016/j.scitotenv.2021.148948</a> |
| Spatial heterogeneity of soil quality within a Mediterranean alley cropping agroforestry system: Comparison with a monocropping system          | Oceania       | Australia | Nathan Campu s | Griffith University                                                                                                  | 2021 | Factors                    | <a href="https://doi.org/10.1016/j.agee.2021.107705">https://doi.org/10.1016/j.agee.2021.107705</a>           |
| Tree composition of cocoa associated species: Lacandon jungle and agroforestry systems, Chiapas, Mexico                                         | Europe        | France    | Montpe llier   | University Montpellier                                                                                               | 2021 | Structural characteristics | <a href="https://doi.org/10.1016/j.ejsobi.2021.103330">https://doi.org/10.1016/j.ejsobi.2021.103330</a>       |
| Can intercropping with native trees enhance structural stability in young rubber (Hevea brasiliensis) agroforestry system?                      | North America | Mexico    | Chiapa s       | Central American University                                                                                          | 2021 | Structural characteristics | <a href="http://dx.doi.org/10.15517/am.v32i2.41630">http://dx.doi.org/10.15517/am.v32i2.41630</a>             |

|                                                                                                                                                       |        |             |            |                                                                                   |      |                            |                                                                                                                                                                                 |
|-------------------------------------------------------------------------------------------------------------------------------------------------------|--------|-------------|------------|-----------------------------------------------------------------------------------|------|----------------------------|---------------------------------------------------------------------------------------------------------------------------------------------------------------------------------|
| On the structural complexity of central European agroforestry systems: a quantitative assessment using terrestrial laser scanning in single-scan mode | Asia   | China       | Haikou     | Hainan University                                                                 | 2021 | Stability Study            | <a href="https://doi.org/10.1016/j.eja.2021.126353">https://doi.org/10.1016/j.eja.2021.126353</a>                                                                               |
| Architectural models, fractals and agroforestry design                                                                                                | Europe | Germany     | Göttingen  | University of Göttingen                                                           | 2021 | Stability Study            | <a href="https://doi.org/10.1007/s10457-021-00620-y">https://doi.org/10.1007/s10457-021-00620-y</a>                                                                             |
| Agroforestry and the utilisation of fragile ecosystems                                                                                                | Europe | Netherlands | Wageningen | Agricultural University                                                           | 1992 | Structural Design          | <a href="https://doi.org/10.1016/0167-8809(92)90108-N">https://doi.org/10.1016/0167-8809(92)90108-N</a>                                                                         |
| <b>CNKI</b>                                                                                                                                           |        |             |            |                                                                                   |      |                            |                                                                                                                                                                                 |
| Preliminary landscape ecology analysis of the spatial structure of agroforestry complex systems in the shallow hilly areas of the Sichuan Basin       | Asia   | China       | Sichuan    | Institute of geography, National Planning Commission, Chinese Academy of Sciences | 1994 | Structural characteristics | 10.16779/j.cnki.1003-5508.1994.01.001.                                                                                                                                          |
| Study on the structure and configuration of agroforestry complex ecosystem in the Lotus Pond trial area                                               | Asia   | China       | Hebei      | Hebei Forestry Institute                                                          | 1995 | Structural optimization    | Pei, J.; Zhang, J.G. Study on the structure and configuration of agroforestry composite ecosystem in Lotus Pond Test Area. Hebei Forestry Science and Technology, 1995(S1):4-7. |

|                                                                                                                                                              |      |       |         |                                                                                   |      |                         |                                                                                                                                                                                                                                                                                                            |
|--------------------------------------------------------------------------------------------------------------------------------------------------------------|------|-------|---------|-----------------------------------------------------------------------------------|------|-------------------------|------------------------------------------------------------------------------------------------------------------------------------------------------------------------------------------------------------------------------------------------------------------------------------------------------------|
| Structural type and benefit analysis of slope agroforestry complex system-A case study of slope agriculture in the Yangtze River Three Gorges reservoir area | Asia | China | Jiangsu | Institute of geography, National Planning Commission, Chinese Academy of Sciences | 1995 | Structural optimization | Shen, Y.C.; Leng, S.Y.; Zhang, Y.T.; Peng, Y.X.; Li, S.C.; Wang, Y.; Jiang, C. Structural Types and Benefits Analysis of Slope Agriculture and Forestry Composite System: A Case Study of Slope Agriculture in the Three Gorges Reservoir Area of the Yangtze River. Geographical Research,1995(03):43-51. |
| The status and role of agroforestry complex management in sustainable rural development                                                                      | Asia | China | Beijing | National Planning Commission of the Chinese Academy of Sciences                   | 1996 | Stability Study         | Yang, X. The status and role of agroforestry complex management in rural sustainable development. Rural Ecological                                                                                                                                                                                         |

|                                                                                                                     |      |       |           |                                      |      |                         |                                                                                                                                                                                                                               |
|---------------------------------------------------------------------------------------------------------------------|------|-------|-----------|--------------------------------------|------|-------------------------|-------------------------------------------------------------------------------------------------------------------------------------------------------------------------------------------------------------------------------|
|                                                                                                                     |      |       |           |                                      |      |                         | Environment,1996(01):37-41.                                                                                                                                                                                                   |
| Research on structural optimization of agroforestry complex systems                                                 | Asia | China | Beijing   | Chinese Academy of Forestry Sciences | 1997 | Structural optimization | Xin, X.B.; Chen, J.Y.; Meng, P. Study on Structural Optimization of Agriculture-Forestry Composite System. Forestry Science Research,1997(05):33-40.]                                                                         |
| Research on the Sustainable Development of Agroforestry Complex Management in Chongqing Three Gorges Reservoir Area | Asia | China | Chongqing | Southwest Normal University          | 1998 | Structural optimization | Lü, J.Q.; Zhong Z.C. Research, on the Composite Management Model of Agriculture and Forestry in the Three Gorges Reservoir Area and Its Sustainable Development. Journal of Southwest Agricultural University,1998(06):74-79. |

|                                                                                                     |      |       |         |                                    |      |                         |                                                                                                                                                                                                                                |
|-----------------------------------------------------------------------------------------------------|------|-------|---------|------------------------------------|------|-------------------------|--------------------------------------------------------------------------------------------------------------------------------------------------------------------------------------------------------------------------------|
| On the Structure and Development of Agroforestry Complex Eco-Economic System in Loess Area          | Asia | China | Beijing | Beijing Forestry University        | 1998 | Structural optimization | Zhu, Q.K.; Zhu, J.Z.; Shen, Y.B.; Chen, X.Y. On the structure and development of agroforestry composite ecological and economic system in loess area. Journal of Soil Erosion and Soil and Water Conservation, 1998(04):73-77. |
| Plant species diversity index of agroforestry complex ecosystems in the Three Gorges reservoir area | Asia | China | Hubei   | Hubei Academy of Forestry Sciences | 1998 | Stability Study         | Zeng, XF.; Huang, Y.Q.; Ge, Z.M.; Yuan, K.K.; Deng, M.M. Plant species diversity index of agroforestry composite ecosystem in the Three Gorges Reservoir Area. Hubei Forestry Science and Technology, 1998(02):1-5.            |



|                                                                                                                                                        |      |       |         |                             |      |                   |                                                                                                                                                                                                  |
|--------------------------------------------------------------------------------------------------------------------------------------------------------|------|-------|---------|-----------------------------|------|-------------------|--------------------------------------------------------------------------------------------------------------------------------------------------------------------------------------------------|
| Evaluation of the characteristics of the agroforestry complex economic system in the Chunhui Mud River Gorge watershed                                 | Asia | China | Shanxi  | Northwest Forestry College  | 1998 | Stability Study   | Xiao, B. Evaluation of characteristics of agricultural and forestry composite ecological and economic system in Chunhua Nihegou Basin. Journal of Northwest Forestry University, 1998(02):43-47. |
| Agroforestry Complex Management Technology in Plain Agricultural Areas                                                                                 | Asia | China | Jiangsu | Nanjing Forestry University | 1999 | Structural Design | DOI: 10.13360/j.issn.1000-8101.1999.04.028.                                                                                                                                                      |
| Study on structural optimization of agroforestry complex management system of protection forest in Yingnan pilot demonstration area of Hengyang County | Asia | China | Hunan   | Hunan Academy of forestry   | 2000 | Structural Design | Zhou, G.; Ni, A.P.; Yuan, Z.K.; Wang D.X. Research on structural optimization scheme of shelter forest agriculture-forestry composite management system in Yingnan Experimental Demonstration    |

|                                                                                                                                          |      |       |         |                                                                         |      |                            |                                                                                                                                                                                                                |
|------------------------------------------------------------------------------------------------------------------------------------------|------|-------|---------|-------------------------------------------------------------------------|------|----------------------------|----------------------------------------------------------------------------------------------------------------------------------------------------------------------------------------------------------------|
|                                                                                                                                          |      |       |         |                                                                         |      |                            | Area of Hengyang County[J]. Hunan Forestry Science and Technology, 2000(03):53-59.                                                                                                                             |
| Effect of agroforestry complex structure on soil nutrient distribution on the slope of Three Gorges reservoir area                       | Asia | China | Hubei   | Hubei Academy of Forestry Sciences                                      | 2000 | Structural characteristics | DOI: 10.13870/j.cnki.stbcb.2000.03.009.                                                                                                                                                                        |
| Study on the internal structure of slope agroforestry complex system and system integrated efficiency in the hilly area of Sichuan basin | Asia | China | Sichuan | Sichuan Academy of Forestry Sciences                                    | 2000 | Structural characteristics | Fei, S.M.; Xiang, C.H. Study on the internal structure and comprehensive efficiency of the composite system of agroforestry on slope in the hilly area of Sichuan Basin[J]. Forestry Sciences, 2000(03):33-39. |
| Spatial variability and temporal stability of soil moisture in agroforestry complex ecosystems                                           | Asia | China | Shanxi  | Northwest University of agriculture and forestry science and technology | 2000 | Stability Study            | Zhu, S.J.; Ding, Y.F.; Xue, T.G. Spatial variability and temporal stability of soil moisture in                                                                                                                |

|                                                                                                           |      |       |         |                             |      |                            |                                                                                                                                                                                                                                          |
|-----------------------------------------------------------------------------------------------------------|------|-------|---------|-----------------------------|------|----------------------------|------------------------------------------------------------------------------------------------------------------------------------------------------------------------------------------------------------------------------------------|
|                                                                                                           |      |       |         |                             |      |                            | agroforestry composite ecosystems[J]. Soil and Water Conservation Research,2000(01):46-48.                                                                                                                                               |
| Ecological characteristics of populations of different composite agroforestry systems in the coastal zone | Asia | China | Jiangsu | Nanjing Forestry University | 2002 | Structural characteristics | Peng, F.R.; Li, J. Huang Baolong, Zhang Jilin. Ecological characteristics of populations in different composite agroforestry systems in coastal zones. Journal of Nanjing Forestry University (Natural Science Edition), 2002(01):45-49. |
| Dissipative structure and agroforestry complex management system                                          | Asia | China | Hunan   | Changde Tourism Bureau      | 2003 | Structural optimization    | Zhao, X. Dissipative Structure and Agroforestry Composite Management System. Journal of Hunan University of                                                                                                                              |

|                                                                                                                               |      |       |         |                                                   |      |                            |                                                                                                                                                                        |
|-------------------------------------------------------------------------------------------------------------------------------|------|-------|---------|---------------------------------------------------|------|----------------------------|------------------------------------------------------------------------------------------------------------------------------------------------------------------------|
|                                                                                                                               |      |       |         |                                                   |      |                            | Arts and Sciences (Social Science Edition), 2003(06):78-80.                                                                                                            |
| Influence of agroforestry complex structure on soil moisture distribution among land units in the Three Gorges reservoir area | Asia | China | Hubei   | Hubei Academy of Forestry Sciences                | 2003 | Structural characteristics | DOI: 10.16843/j.sswc.2003.03.006.                                                                                                                                      |
| Structure and main mode of agroforestry compound management in the Three Gorges reservoir area                                | Asia | China | Henan   | Yellow River water conservancy Research Institute | 2003 | Structural optimization    | DOI: 10.14123/j.cnki.swcc.2003.06.021.                                                                                                                                 |
| Progress of research on ecological principles and eco-economic functions of agroforestry complex ecosystems                   | Asia | China | Beijing | Beijing Forestry University                       | 2003 | Stability Study            | DOI: 10.16843/j.sswc.2003.04.015.                                                                                                                                      |
| Research on agroforestry compound pattern division and planting structure in Longnan Mountain                                 | Asia | China | Guansu  | Gansu Institute of soil and water conservation    | 2005 | Structural Design          | Zhou, B. Study on the Division of Agroforestry Composite Model and Planting Structure in Longnan Mountain. Soil and Water Conservation Research, 2005(05):207-209+224. |

|                                                                                                          |      |       |         |                                    |      |                         |                                                                                                                                                                                                   |
|----------------------------------------------------------------------------------------------------------|------|-------|---------|------------------------------------|------|-------------------------|---------------------------------------------------------------------------------------------------------------------------------------------------------------------------------------------------|
| Root distribution and fractal study of agroforestry complex system in Three Gorges reservoir area        | Asia | China | Hubei   | Hubei Academy of Forestry Sciences | 2006 | Structural optimization | Huang, Y.G.; Tu, G.X.; Li, F.L. Root distribution and fractal study of agriculture-forestry composite system in Three Gorges Reservoir Area. Hubei Forestry Science and Technology, 2006(04):1-4. |
| Composite agroforestry system and design in the arsenic sandstone area of Junghar Banner, Inner Mongolia | Asia | China | Beijing | Beijing Forestry University        | 2007 | Structural Design       | Huang, Y.Q.; Tu, G.G.; Li, F.L. Root distribution and fractal study of agriculture-forestry composite system in Three Gorges Reservoir Area. Hubei Forestry Science and Technology, 2006(04):1-4. |

|                                                                                                          |      |       |             |                                                     |      |                            |                                                                                                                                                   |
|----------------------------------------------------------------------------------------------------------|------|-------|-------------|-----------------------------------------------------|------|----------------------------|---------------------------------------------------------------------------------------------------------------------------------------------------|
| Study on agroforestry composite model based on water consumption characteristics                         | Asia | China | Beijing     | Beijing Forestry University                         | 2007 | Factors                    | Ma, C.M. Study on agroforestry composite model based on water consumption characteristics. Beijing Forestry University, 2007.]                    |
| Composite agroforestry system and design in the arsenic sandstone area of Junghar Banner, Inner Mongolia | Asia | China | Beijing     | Beijing Forestry University                         | 2007 | Structural Design          | Liu, L.Y. Composite agroforestry system and design of arsenic sandstone area of Junger Banner, Inner Mongolia. Beijing Forestry University, 2007. |
| Agroforestry Complex Management and Sustainable Development of Forestry in Henan Plain                   | Asia | China | Henan       | Henan forestry investigation and Planning Institute | 2007 | Stability Study            | DOI: 10.13601/j.issn.1005-5215.2007.04.035.                                                                                                       |
| Effect of protective forest structure on plant biodiversity in agroforestry complex ecosystems           | Asia | China | Helongjiang | Tohoku University of Agriculture                    | 2008 | Structural characteristics | DOI: 10.19720/j.cnki.issn.1005-9369.2008.01.013.                                                                                                  |

|                                                                                                                        |      |       |         |                             |      |                         |                                                                                                                                                                                   |
|------------------------------------------------------------------------------------------------------------------------|------|-------|---------|-----------------------------|------|-------------------------|-----------------------------------------------------------------------------------------------------------------------------------------------------------------------------------|
| Research on the construction technology and model of composite agroforestry system in arsenic sandstone area           | Asia | China | Beijing | Beijing Forestry University | 2008 | Structural Design       | Yin, L.G. Research on the construction technology and model of composite agroforestry system in arsenic sandstone area. Beijing Forestry University, 2008.]                       |
| Research on composite agroforestry landscape pattern and structure optimization technology of Yong shou County, Weibei | Asia | China | Beijing | Beijing Forestry University | 2009 | Structural optimization | Ren, Y. Research on composite agroforestry landscape pattern and structure optimization technology of Yong shou County, Weibei Loess Plateau. Beijing Forestry University, 2009.] |
| Functional analysis and model construction of composite agroforestry system in arsenic sandstone area                  | Asia | China | Beijing | Beijing Forestry University | 2009 | Structural Design       | He, J.L. Functional analysis and model construction of                                                                                                                            |

|                                                                                                                     |      |       |        |                                                                         |      |                 |                                                                                                                                                                 |
|---------------------------------------------------------------------------------------------------------------------|------|-------|--------|-------------------------------------------------------------------------|------|-----------------|-----------------------------------------------------------------------------------------------------------------------------------------------------------------|
|                                                                                                                     |      |       |        |                                                                         |      |                 | composite agroforestry system in arsenic sandstone area. Beijing Forestry University,2009.                                                                      |
| Study on soil fertility of several agroforestry composite models in Weibei                                          | Asia | China | Shanxi | Northwest University of agriculture and forestry science and technology | 2009 | Stability Study | Zhong, C.G. Study on soil fertility of several agroforestry composite models in Weibei. Northwest A&F University, 2009.                                         |
| Physiological and ecological characteristics and productivity of agroforestry complex system in Weibei Loess Region | Asia | China | Shanxi | Northwest University of agriculture and forestry science and technology | 2009 | Stability Study | Peng, X.b. Physiological and ecological characteristics and productivity of agroforestry composite system in Weibei Loess Area. Northwest A&F University,2009.] |



|                                                                                                        |      |       |         |                                                                                   |      |                 |                                                                                                                                                |
|--------------------------------------------------------------------------------------------------------|------|-------|---------|-----------------------------------------------------------------------------------|------|-----------------|------------------------------------------------------------------------------------------------------------------------------------------------|
| Test the status and role of agroforestry compound management in the development of forestry            | Asia | China | Beijing | Investigation, planning and Design Institute of the State Forestry Administration | 2009 | Stability Study | Yang, X. The status and role of agroforestry complex management in rural sustainable development. Rural Ecological Environment,1996(01):37-41. |
| Agroforestry Complex Management and Sustainable Forestry Development                                   | Asia | China | Beijing | Investigation, planning and Design Institute of the State Forestry Administration | 2009 | Stability Study | Yu, J. Stability and sustainability of agroforestry-pastoral complex ecosystems. Northeast Forestry University,2016.                           |
| Agroforestry Complex Ecosystem Service Functions and Their Maintenance and Conservation in Xuzhou City | Asia | China | Jiangsu | Xuzhou Institute of Engineering                                                   | 2009 | Stability Study | Zang, H. Service functions of agroforestry complex ecosystems in Xuzhou City and their maintenance and conservation. Science and Technology of |

|                                                                                                                       |      |       |             |                                                                                                                               |      |                         |                                                                                                                                                 |
|-----------------------------------------------------------------------------------------------------------------------|------|-------|-------------|-------------------------------------------------------------------------------------------------------------------------------|------|-------------------------|-------------------------------------------------------------------------------------------------------------------------------------------------|
|                                                                                                                       |      |       |             |                                                                                                                               |      |                         | Western China,2009,8(14):49-50+52.                                                                                                              |
| Exploring the structural design of agroforestry complex systems                                                       | Asia | China | Schuan      | Temporal stability analysis identifies soil water relations under different land use types in an oasis agroforestry ecosystem | 2010 | Structural Design       | DOI: 10.13843/j.cnki.lyjj.2010.10.006 .                                                                                                         |
| Modern logistics modeling of agroforestry-pastoral complex ecosystems                                                 | Asia | China | Helongjiang | Northeast Forestry University                                                                                                 | 2010 | Stability Study         | Yuan, H.L. Establishment of a logistics model of modern agroforestry-animal husbandry composite ecosystem. Northeast Forestry University,2010.] |
| Linkage stability of agroforestry-pastoral complex ecosystems                                                         | Asia | China | Helongjiang | Northeast Forestry University                                                                                                 | 2010 | Stability Study         | DOI: 10.13759/j.cnki.dlxb.2010.12.014.                                                                                                          |
| Research progress on optimal allocation and structural control of forest and grass complexes in semi-arid loess areas | Asia | China | Beijing     | Beijing Forestry University                                                                                                   | 2011 | Structural optimization | Gao, L.B.; Bi, H.X.; Yun, L.; Liu, L.X.; Zhu, Y. Research Progress on Optimal                                                                   |

|                                                                                                                            |      |       |             |                                                |      |                   |                                                                                                                                                  |
|----------------------------------------------------------------------------------------------------------------------------|------|-------|-------------|------------------------------------------------|------|-------------------|--------------------------------------------------------------------------------------------------------------------------------------------------|
|                                                                                                                            |      |       |             |                                                |      |                   | Allocation and Structural Regulation of Forest-Grass Complex in Loess Semi-arid Zone. Soil and Water Conservation Research,2011, 18(03):260-266. |
| Study on the interspecific relationship of intercropping systems among fruit farmers in the loess area of western Jinjiang | Asia | China | Beijing     | Beijing Forestry University                    | 2011 | Stability Study   | Yun, L. Study on interspecific relationship between fruit farmers in the Loess Region of Western Jinxi [D]. Beijing Forestry University,2011.    |
| Exploration of agroforestry compound model                                                                                 | Asia | China | Helongjiang | Jidong Forestry Bureau Yonghe Forestry Station | 2012 | Structural Design | Li, C.Y. Discussion on the Composite Model of Agriculture and Forestry[J]. Science and Technology Innovation and                                 |

|                                                                                  |      |       |              |                                                                |      |                            |                                                                                                                                                    |
|----------------------------------------------------------------------------------|------|-------|--------------|----------------------------------------------------------------|------|----------------------------|----------------------------------------------------------------------------------------------------------------------------------------------------|
|                                                                                  |      |       |              |                                                                |      |                            | Application,2012(15):243.                                                                                                                          |
| Simulation of walnut canopy structure dynamics in an agroforestry complex system | Asia | China | Beijing      | Chinese Academy of Forestry Sciences                           | 2012 | Structural optimization    | Li, C.Y. Dynamic simulation of walnut canopy structure in agroforestry composite system. Chinese Academy of Forestry,2012.                         |
| Research on the structure of agroforestry complex management system              | Asia | China | Heilongjiang | Heilongjiang Third Forest Investigation and Planning Institute | 2014 | Structural characteristics | On the waterfront. Study on the structure of agriculture and forestry composite management system. Forestry Exploration and Design,2014(01):18-19. |
| A review of ecological service functions of agroforestry complex systems         | Asia | China | Beijing      | Beijing Forestry University                                    | 2015 | Stability Study            | Gu, Y.; Zhu, Y.J.; Jiang, W. A review on the ecological service function of agroforestry composite system.                                         |

|                                                                                                                      |      |       |             |                                                                         |      |                         |                                                                                                                                                |
|----------------------------------------------------------------------------------------------------------------------|------|-------|-------------|-------------------------------------------------------------------------|------|-------------------------|------------------------------------------------------------------------------------------------------------------------------------------------|
|                                                                                                                      |      |       |             |                                                                         |      |                         | Tropical Agricultural Sciences,2015,35(10):57-63.                                                                                              |
| Productivity of the Weibei agroforestry complex system and its soil-root response                                    | Asia | China | Shanxi      | Northwest University of agriculture and forestry science and technology | 2016 | Structural optimization | Wang,L. Productivity and soil root response of Weibei Agroforestry Composite System. Northwest A&F University,2016.                            |
| Stability and sustainability of agroforestry-pastoral complex ecosystems                                             | Asia | China | Helongjiang | Northeast Forestry University                                           | 2016 | Stability Study         | Yuan, H.L. Establishment of a logistics model of modern agroforestry-animal husbandry composite ecosystem. Northeast Forestry University,2010. |
| Analysis of the spatial pattern of agroforestry complex system in loess hilly areas and suggestions for optimization | Asia | China | Shanxi      | Northwest University of agriculture and forestry science and technology | 2020 | Structural optimization | DOI: 10.27409/d.cnki.gxbnu.2020.000361.                                                                                                        |
